1 **Title:** Prognostic value of an integrated human papilloma virus and immunoscore model to  
2 predict survival in vulva squamous cell carcinoma

3

4 Rammah Elnour<sup>1</sup>, Ingjerd Helstrup Hindenes<sup>2</sup>, Malene Færevaaag<sup>2</sup>, Ingrid Benedicte Moss  
5 Kolseth<sup>3</sup>, Liv Cecilie Vestrheim Thomsen<sup>3,4</sup>, Anne Christine Johannessen<sup>1,5</sup>, Daniela Elena  
6 Costea<sup>1,5</sup>, Line Bjørge<sup>3,4\*</sup>, Harsh Nitin Dongre<sup>1#\*</sup>

7

8 <sup>1</sup>Center for Cancer Biomarkers CCBIO and Gade Laboratory of Pathology, Department of  
9 Clinical Medicine, University of Bergen, Bergen, Norway. <sup>2</sup>Department of Chemistry,  
10 University of Bergen, Bergen, Norway. <sup>3</sup>Department of Obstetrics and Gynecology, Haukeland  
11 University Hospital, Bergen, Norway. <sup>4</sup>Center for Cancer Biomarkers CCBIO, Department of  
12 Clinical Science, University of Bergen, Bergen, Norway. <sup>5</sup>Department of Pathology, Laboratory  
13 Clinic, Haukeland University Hospital, Bergen, Norway.

14

15 \*These authors contributed equally.

16

17 #Corresponding author: [harsh.dongre@uib.no](mailto:harsh.dongre@uib.no)

18 Jonas Lies Vei 65, Department of Clinical Medicine, University of Bergen, 5021 Norway

19

20 Running title: Prognostic impact of immunoscore in VSCC

21

22 Keywords: immunoscore, prognostic marker, vulva squamous cell carcinoma, immune-  
23 oncology, digital pathology

24 **Abstract:**

25 **Background:** While the prognostic value of immune-related biomarkers is well characterized in  
26 many solid tumors, their significance in vulva squamous cell carcinoma (VSCC) remains unclear.  
27 Here, we report a comprehensive analysis of programmed death-ligand 1 (PD-L1) and immune  
28 cell infiltrates in VSCC and establish immunoscore models for classification of the disease.

29  
30 **Methods:** Archival tissues, immunohistochemistry, and digital quantification were used to  
31 investigate the number of CD4+, CD8+, CD68+, CD14+, FoxP3+, and PD-L1+ cells in epithelial  
32 and stromal compartments of VSCC ( $n=117$ ). Immunoscores were developed using these  
33 parameters and applying the least absolute shrinkage and selection operator (LASSO) to identify  
34 predictors of survival. Immunoscores were integrated with HPV status, as determined by mRNA  
35 *in situ* hybridization, to construct internally validated nomograms. The models were assessed using  
36 Harrell's concordance-index (c-index), calibration plots, Kaplan-Meier curves, and decision curve  
37 analysis.

38  
39 **Results:** Advanced VSCC (FIGO stage III/IV) was characterized by high numbers of CD68+  
40 macrophages and PD-L1+ cells (Spearman's correlation,  $\rho>0.80$ ) in the epithelium. PD-L1 status  
41 independently predicted poor progression free survival (PFS) (HR=1.80, (95% CI (1.024-3.170),  
42  $p=0.041$ ). High stromal CD68+ or CD14+ myeloid cell infiltration was associated with poor PFS  
43 and disease specific survival (DSS) ( $p<0.05$ ). Immunological parameters were used to determine  
44 immunoscores. Immunoscore<sup>PFS</sup> and immunoscore<sup>DSS</sup> were independent prognosticators of PFS  
45 ( $p=0.001$ ) and DSS ( $p=0.007$ ) respectively. Integrating immunoscores with HPV status (IS-HPV  
46 index) improved the prognostic impact of the models. The c-index of IS-HPV index<sup>PFS</sup> was 0.750

47 for prediction of PFS compared to 0.666 for HPV status and 0.667 for immunoscore<sup>PFS</sup>. The c-  
48 index of IS-HPV index<sup>DSS</sup> was 0.752 for predicting DSS compared to 0.631 for HPV status and  
49 0.715 for immunoscore<sup>DSS</sup>.

50

51 **Conclusion:** In summary, an index based on HPV status and an immunoscore built on PD-L1  
52 expression and immune cell infiltrates could potentially serve as a prognostic tool to refine risk  
53 stratification in VSCC. Further validation is warranted to demonstrate clinical utility.

54

55

56

57

58

59

60

61

62

63

64

65

66

67

68

69

70 WHAT IS ALREADY KNOWN ON THIS TOPIC

71 Immunoscores have emerged as promising biomarkers in several solid tumors, however the  
72 prognostic potential of these models in vulva squamous cell carcinoma (VSCC) remains  
73 unexplored. Immunoscores are traditionally based on quantification of CD3+ and CD8+ T  
74 lymphocytes within the tumor core and invasive margin. However recent studies have highlighted  
75 the prognostic significance of additional immune cell subtypes, such as macrophages, in predicting  
76 patient survival. Advanced quantitative methods that enable the determination of immunoscores,  
77 incorporating expression of immune checkpoint proteins and infiltration of various immune cell  
78 populations within tumors, warrant further investigation.

79

80 WHAT THIS STUDY ADDS

81 This study investigates PD-L1 expression and distinct T lymphocyte and myeloid cell subsets  
82 within the spatial architecture of VSCC to identify immunological markers with prognostic value.  
83 Computational analysis identified PD-L1+ cells, CD8+ T lymphocytes, FoxP3+ T lymphocytes,  
84 and CD14+ myeloid cells as significant survival predictors in VSCC, leading to the development  
85 of immunoscores. These immunoscores demonstrated superior predictive performance compared  
86 to the individual parameters used to construct the models. Moreover, integrating immunoscores  
87 with HPV status and constructing, for the first time, an immunoscore-HPV index nomogram  
88 enhanced the prognostic accuracy and net benefit of the models.

89

90 HOW THIS STUDY MIGHT AFFECT RESEARCH, PRACTICE OR POLICY

91 The immunoscore-HPV index proposed in this study holds potential as a rapid diagnostic tool to  
92 enhance risk stratification in VSCC and facilitate the identification of patients who may benefit

93 from less aggressive treatment approaches. Incorporating immunoscores with clinicopathological  
94 or molecular features linked to carcinogenesis in prognostic models could improve classification  
95 strategies in VSCC and other cancer types.

96

97

98

99

100

101

102

103

104

105

106

107

108

109

110

111

112

113

114

115

## 116 Introduction

117 Vulvar squamous cell carcinoma (VSCC) is a relatively rare but heterogenous disease, with 47,300  
118 new cases and 18,600 deaths globally each year (1). VSCC accounts for six percent of all  
119 gynecological malignancies (2), and its incidence rates have been increasing steadily (3). Despite  
120 recent surgical advances, 12-37% of VSCC patients experience disease recurrence, with a five-  
121 year survival rate ranging between 30-60% (4, 5). For metastatic disease, the five-year survival  
122 rate is reported to be below 30% (6). Beyond surgical resection and radiochemotherapy, treatment  
123 options are limited, especially for managing advanced stage disease (7). While precision medicine  
124 guided by molecular subtyping has been adopted in various cancers, efforts to incorporate  
125 molecular risk stratification in VSCC have only recently begun. VSCC is characterized by two  
126 distinct etiopathogenic pathways: high risk human papilloma virus (HPV)-associated VSCC,  
127 driven by the integration of the HPV genome and the expression of the E6/E7 oncoproteins, and  
128 HPV-independent VSCC which often arises in the context of inflammatory vulvar lesions such as  
129 lichen sclerosus (8, 9). Studies have shown that HPV-associated VSCC has better prognosis  
130 compared to the more common HPV-independent VSCC (10, 11). Thus, identifying biomarkers  
131 to predict survival especially in HPV-independent VSCC is urgently needed.

132  
133 The cancer immune contexture, encompassing the infiltration of various immune cell populations  
134 and the expression of immune checkpoint proteins (12), is currently being analyzed to identify  
135 biomarkers with predictive and prognostic potential in several gynecological cancers (13).  
136 Targeting programmed cell death protein-1 (PD-1) with an immune checkpoint inhibitor, has been  
137 associated with prolonged survival in a subset of patients with advanced, recurrent, or metastatic  
138 VSCC (14). This suggests that modulating the tumor immune microenvironment (TIME) is a

139 viable therapeutical strategy with significant impact on survival, however immunotherapy has not  
140 yet been included into standard treatment regimens. Furthermore, the prognostic value of immune  
141 checkpoints and specific immune cell subsets within the spatial architecture of VSCC remains  
142 unclear (15-18). Recently, studies have indicated that the TIME can be leveraged to establish  
143 cancer classification strategies with clinical utility. Indeed, the immunoscore became the first  
144 standardized consensus assay for classifying hot and cold tumors based on the infiltration of CD3+  
145 and CD8+ T lymphocytes in the tumor core and invasive margin in colon cancer (19-21). There  
146 have only been a few studies focused on establishing prognostic models, such as nomograms,  
147 capable of stratifying VSCC patients and predicting survival. To our knowledge, immunoscore  
148 models based on spatially resolved immunological features have yet to be reported for this disease.  
149 Developing prognostic tools based on compartment-specific infiltration patterns of immune cell  
150 subsets in both HPV-associated and HPV-independent tumors may enhance personalized medicine  
151 and allow for individual risk stratification of VSCC.

152  
153 In this study, we report a comprehensive *in-situ* analysis of PD-L1 expression and distinct T  
154 lymphocyte- and myeloid cell populations in VSCC, revealing components of the immune  
155 landscape associated with disease progression. Using these immunological features, we  
156 established a novel immunoscore model for VSCC. Further, we integrated the immunoscore with  
157 HPV status and assessed the prognostic value of the resulting immunoscore-HPV status index in  
158 predicting risk progression in VSCC.

159  
160  
161

## 162 Materials and Methods

### 163 Study population

164 One hundred and thirty-eight patients diagnosed with VSCC and undergoing treatment at  
165 Haukeland University Hospital (HUS), Bergen, Norway between 1999-2017 were included in this  
166 retrospective study. The patients were treatment naïve, prospectively sampled, and staged  
167 according to the FIGO (International Federation of Gynecology and Obstetrics) criteria. Written  
168 consent was obtained from all participants prior to inclusion. Most of the patients were registered  
169 in Bergen Gynecologic Cancer Biobank (GYNCAN). A few tumor samples were obtained from  
170 the diagnostic biobank at the Department of Pathology (HUS). Cases with missing sample,  
171 insufficient epithelial and/or stromal tissue material, neoadjuvant treatment, or withdrawn consent  
172 were excluded from this study ( $n = 21$ ). Clinicopathological data were extracted from medical  
173 journals as previously described (10). This study was approved by the Regional Committee for  
174 Medical and Health Research Ethics Norway (REK Nos: 2017/279 and 2014/1907).

175

### 176 Sample collection and tissue microarray construction

177 Archival formalin-fixed paraffin embedded (FFPE) sections were hematoxylin and eosin stained  
178 to select the areas for construction of tissue microarrays (TMA). A minimum of two 1 mm cylinder  
179 biopsies from the tumor front areas of primary tumors, recurrences, and metastases were punched  
180 out and placed in paraffin blocks using a precision instrument (Beecher Instruments, Silver Spring,  
181 MD, USA). TMA sections of 4- $\mu$ m thickness were cut using a microtome (Leica Microsystems,  
182 Wetzlar, Germany) and mounted on Superfrost Plus glass slides (Thermo Fisher Scientific,  
183 Waltham, MA, USA). Slides were then incubated at 56°C for 24 hours and stored at 4°C in  
184 preparation for immunostaining.



## 185 **Immunohistochemistry and HPV detection**

186 Immunohistochemistry (IHC) was performed on TMA sections using a Ventana Benchmark  
187 ULTRA Autostainer (Roche Tissue Diagnostics, Tucson, AZ, USA), according to the  
188 manufacturer's instruction. CD4<sup>+</sup> helper T cells, CD8<sup>+</sup> cytotoxic T cells, CD68<sup>+</sup> macrophages,  
189 CD14<sup>+</sup> monocytes, FoxP3<sup>+</sup> regulatory T cells, and PD-L1<sup>+</sup> cells were identified using the  
190 antibodies summarized in Supplementary Table 1. The OptiView DAB IHC detection kit (Roche  
191 Tissue Diagnostics) was used for detection of primary antibodies and visualization. The detailed  
192 protocols for p16 and p53 IHC, HPV DNA PCR, and HPV mRNA *in situ* hybridization (ISH) are  
193 described elsewhere (10, 22).

194

## 195 **Digital quantification and evaluation**

196 Immunostained TMAs were digitally scanned using a Hamamatsu NanoZoomer-XR whole slide  
197 scanner (Hamamatsu Photonics, Hamamatsu City, Japan) at 40x magnification and analyzed using  
198 the open-source software QuPath (version 0.4.0) (23). For digital quantification, epithelial and  
199 stromal compartments of TMA cores were manually annotated using QuPath tools (Supplementary  
200 Figure 1A). QuPath automated algorithms for setting vector stains and color-deconvolution were  
201 then used to detect cell nuclei and immune markers based on adjusted hematoxylin and 3, 3'-  
202 diaminobenzidine (DAB) thresholds (Supplementary Figure 1B-C). The hematoxylin and DAB  
203 thresholds were maintained between slides of each marker to acquire homogenous results. Routine  
204 calibration was performed together with a qualified pathologist (DEC). The number of positive  
205 cells for each marker per mm<sup>2</sup> compartment was then calculated and the mean of all cores from  
206 each individual patient sample was used for analysis. CD4<sup>+</sup>, CD8<sup>+</sup>, CD68<sup>+</sup>, CD14<sup>+</sup>, and FoxP3<sup>+</sup>  
207 immune cells were dichotomized into high and low infiltration based on median positive cell

208 counts per mm<sup>2</sup> epithelial or stromal compartment for each respective marker (Supplementary  
209 Figure 2). PD-L1 status was determined by using both the tumor proportion score method (TPS:  
210 number of PD-L1+ tumor cells divided by the total number of tumor cells multiplied by 100) and  
211 the combined positive score method (CPS: total number of PD-L1+ tumor cells and PD-L1+  
212 stromal cells divided by the total number of tumor cells multiplied by 100) (24). Cases with a  
213 discriminative cut-off value of TPS > 1 or CPS > 1 were considered PD-L1 positive.

214

### 215 **Statistical analysis**

216 All statistical analysis and data visualization was performed using IBM SPSS 25.0 (SPSS,  
217 Chicago, IL) and R (version 4.3.0 or higher). Differences concerning infiltration of cells within  
218 epithelial or stromal compartments were investigated using the Wilcoxon-Signed Rank Test. The  
219 chi-squared test was used to explore associations between immune subsets and clinicopathological  
220 features. The Mann-Whitney U test was used to study differences in the number of infiltrating cells  
221 based on clinicopathological features. Correlations between different cell populations were  
222 analyzed using the Spearman's rank correlation coefficient. Survival analysis was performed using  
223 the R packages "survival" (v.3.5-7) and "survminer" (v.0.4.9) for Kaplan-Meier estimator, log-  
224 rank test, and Cox regression models. p-values  $\leq 0.05$  were considered statistically significant.  
225 Parameters that were significant in univariate analysis were further analyzed in multivariate  
226 analysis. Progression free survival (PFS) was calculated as the time in months from the date of  
227 termination of primary treatment to the date of recurrence or death. Disease specific survival (DSS)  
228 was calculated as the time in months from date of primary treatment to the date of death from  
229 disease. Patients alive at last contact or patients deceased from other causes were censored. The  
230 "glmnet" package (v.4.1-8) was used for the least absolute shrinkage and selection operator

231 (LASSO) to determine immunoscores based on CD4+, CD8+, CD68+, CD14+, FoxP3+, and PD-  
232 L1+ expression in epithelial and stromal compartments of tumors. Immunoscores were  
233 dichotomized using the maximally selected rank statistics method in the survminer package or by  
234 median values. Immunoscores and HPV mRNA ISH were used to construct logistic regression  
235 models and nomograms using the “rms” (v.6.7-1) package and “dcurves” (v.0.4.0) was used for  
236 decision curve analysis.

237

238

239

240

241

242

243

244

245

246

247

248

249

250

251

252

253

## 254 Results

### 255 **Advanced stage VSCC and HPV-independent tumors displayed higher expression of PD-L1** 256 **and infiltration of CD68+ macrophages**

257 The number of infiltrating CD4+, CD8+, CD68+, CD14+, or FoxP3+ cells (Figure 1A) were higher  
258 in the stroma of VSCC compared to the epithelium ( $p < 0.05$ ), however no significant difference  
259 was observed in the amount of PD-L1+ cells (Supplementary Figure 3A). CD68+ and CD14+  
260 myeloid cells were the most prevalent immune cell subsets (Supplementary Table 2), and higher  
261 infiltration of these cells in the epithelium was linked to clinicopathological features including  
262 tumor size (Supplementary Table 3). Advanced tumors (FIGO stage III and IV) were more highly  
263 populated with epithelial PD-L1+ and CD68+ cells (Figure 1B). Accordingly, tumors larger in size  
264 ( $> 4\text{cm}$ ) or with lymph node metastasis were found to have increased numbers of these subsets in  
265 the epithelium. Larger tumors also demonstrated higher infiltration of CD14+ monocytes, in both  
266 the epithelium and stroma (Supplementary Figure 3B-C). Within the advanced VSCC subgroup,  
267 HPV-independent tumors (as determined by HPV mRNA ISH) demonstrated a higher number of  
268 PD-L1+ cells in the stroma compared to HPV-associated counterparts ( $p < 0.05$ ) (Figure 1C).  
269 Moreover, HPV-independent tumors demonstrated higher stromal infiltration of both CD68+ and  
270 CD14+ myeloid subsets in early stage VSCC (FIGO stage I and II). Further, the number of  
271 epithelial CD68+ macrophages and stromal CD14+ monocytes were higher in tumors with *TP53*  
272 mutations and no p16 expression (p53+/p16-) compared to the p53-/p16+ subtype (Supplementary  
273 Figure 3D-E). Among T lymphocyte subsets, CD8+ cytotoxic T cells were the predominant group,  
274 whereas the infiltration of CD4+ helper T cells was low, particularly in the epithelial compartments  
275 (Supplementary Table 2). Apart from FoxP3+ regulatory T cells, which were associated with  
276 disease specific survival ( $p < 0.05$ ), no significant associations were found between infiltration of

277 T cell subsets and clinicopathological features (Supplementary Table 3). To explore the  
278 correlations between PD-L1 and immune cell infiltration in the epithelial and stromal  
279 compartments, the Spearman's rank correlation coefficient was utilized. The number of PD-L1+  
280 cells was positively correlated with all immune subsets in both compartments ( $p < 0.05$ ) (Figure  
281 1D). The strongest correlation was identified between PD-L1+ cells and CD68+ macrophages in  
282 the epithelium ( $\rho = 0.80$ ) and stroma ( $\rho = 0.71$ ) (Figure 1E-F) whereas CD4+, CD8+, CD14+, and  
283 FoxP3+ infiltrates were moderately correlated with PD-L1+ ( $\rho = 0.43-0.58$ ).

284

### 285 **Positive PD-L1 status independently predicted poor PFS**

286 Traditional prognostic factors for VSCC, including age and HPV status, were significantly linked  
287 to survival in this cohort (Supplementary Table 4). The analysis was expanded to assess the  
288 prognostic impact of stratifying patients by immune cell infiltration and PD-L1 status. Kaplan-  
289 Meier analysis revealed positive PD-L1 status (TPS  $> 1$ ) or high stromal infiltration of CD14+  
290 monocytes to be associated with poor PFS (log rank test:  $p = 0.002$  and  $p = 0.015$ , respectively)  
291 (Figure 2A). This was also the case for high infiltration of CD68+ macrophages in stromal or  
292 epithelial compartments (log rank test:  $p = 0.019$  and  $p = 0.042$  respectively) (Figure 2A and  
293 Supplementary Figure 4A-B). Furthermore, high infiltration of either CD68+ macrophages or  
294 CD14+ monocytes in the stroma predicted poor DSS (log rank test:  $p = 0.011$  and  $p = 0.027$   
295 respectively). In contrast, high epithelial infiltration of FoxP3+ T cells was associated with more  
296 favorable DSS outcomes (log rank test:  $p = 0.036$ ) (Figure 2B). Results from the univariate Cox  
297 analysis aligned with these findings however, after adjusting for age and HPV status in the  
298 multivariate Cox analysis, only PD-L1 status (TPS  $> 1$ ) remained an independent prognostic  
299 indicator for PFS (HR = 1.80,  $p = 0.041$ ). In contrast PD-L1 status as determined by CPS  $> 1$ , was

300 not significantly associated with PFS (Table 1). None of the investigated markers demonstrated  
301 independent prognostic value for DSS after adjusting for confounders. In this cohort, 58/117  
302 primary tumors (49.6%), 21/29 recurrences (72.4%), and 25/36 metastatic lesions (69.4%) were  
303 PD-L1 positive (TPS > 1). Moreover, variations in PD-L1 status were evident between primary  
304 tumors and their respective recurrent or metastatic counterparts (Figure 2C-D). Within the cohort  
305 of PD-L1 negative primary tumors, eight of the matched recurrences (61.5%) and four of the  
306 matched metastases (30.8%) were PD-L1 positive respectively (Figure 2E-F). Consistent with PD-  
307 L1+ infiltration patterns, positive PD-L1 status was associated with HPV-independent VSCC and  
308 the p53+/p16- subtype (Table 2).

309

### 310 **Construction of immunoscore models with independent prognostic value for PFS and DSS**

311 To further evaluate prognostic epithelial and stromal immune features and establish a combined  
312 immunoscore, the LASSO Cox regression model was used in which tuning parameter ( $\lambda$ ) values  
313 were selected by 10-fold cross-validation (via minimum criteria) (Figure 3A, Supplementary  
314 Figure 5A). This identified four non-zero coefficients based on PFS and five non-zero coefficients  
315 based on DSS (Figure 3B, Supplementary Figure 5B). Immunoscores were subsequently  
316 calculated using these coefficients:  $\text{immunoscore}^{\text{PFS}} = (1.8609 \times \text{number of epithelial PD-L1+}$   
317  $\text{cells/mm}^2) + (-4.5255 \times \text{number of epithelial CD8+ cells/mm}^2) + (2.1746 \times \text{number of epithelial}$   
318  $\text{FoxP3+ cells/mm}^2) + (0.1497 \times \text{number of stromal CD14+cells/mm}^2) \times 10^{-4}$  and  $\text{immunoscore}^{\text{DSS}}$   
319  $= (0.2744 \times \text{number of stromal PD-L1+ cells/mm}^2) + (-0.1481 \times \text{number of epithelial CD8+}$   
320  $\text{cells/mm}^2) + (-3.160 \times \text{number of epithelial FoxP3+ cells/mm}^2) + (-0.0143 \times \text{number of epithelial}$   
321  $\text{CD14+cells/mm}^2) + (0.1436 \times \text{number of stromal CD14+cells/mm}^2) \times 10^{-3}$ ). Next, the association  
322 between immunoscores and survival outcomes was investigated. In multivariate Cox analysis,  
323  $\text{immunoscore}^{\text{PFS}}$  and  $\text{immunoscore}^{\text{DSS}}$  were independent prognosticators of PFS (HR = 5.09, p =

324 0.001) and DSS (HR = 5.98,  $p = 0.007$ ) respectively after adjusting for confounders (Figure 3C-  
325 D). When dichotomizing immunoscores using the maximally selected rank statistics method  
326 Kaplan Meier analysis showed that a high immunoscore<sup>PFS</sup> was associated with poor PFS (log rank  
327 test:  $p < 0.001$ ) and a high immunoscore<sup>DSS</sup> predicted poor DSS (log rank test:  $p < 0.001$ ) (Figure  
328 3E). The VSCC cohort was then stratified by HPV mRNA ISH status to investigate the prognostic  
329 contribution of immunoscores within the HPV-independent subgroup. This analysis revealed that  
330 a low immunoscore<sup>PFS</sup> and a low immunoscore<sup>DSS</sup> significantly predicted favorable PFS (log rank  
331 test:  $p < 0.001$ ) and DSS (log rank test:  $p < 0.001$ ), respectively in HPV-independent tumors  
332 (Figure 3F). In contrast to the maximally selected rank statistics method, only immunoscore<sup>DSS</sup>  
333 was significantly associated with DSS in the entire cohort (log rank test:  $p = 0.002$ ) when  
334 immunoscores were dichotomized by median values (Figure 3G).

335

### 336 **Integration of immunoscores with HPV status and validation of the prognostic models**

337 Drawing upon the prognostic implications of immunoscores and HPV status, we amalgamated  
338 these variables to formulate nomograms termed as immunoscore-HPV (IS-HPV) index<sup>PFS</sup> and IS-  
339 HPV index<sup>DSS</sup> (Figure 4A). Using the nomograms, the probability of an outcome can be predicted  
340 by calculating a total score based on the points contributed by immunoscore and HPV status  
341 predictors. A bootstrap resampling approach was employed to generate 1,000 iterations for internal  
342 validation of the immunoscore and IS-HPV index models. Calibration plots indicated satisfactory  
343 agreement between observed outcomes and predicted outcomes from the nomograms. The IS-HPV  
344 index<sup>PFS</sup> and IS-HPV index<sup>DSS</sup> concordance (c)-index were 0.752 (corrected c-index: 0.750) and  
345 0.760 (corrected c-index: 0.752) for PFS and DSS, respectively (Figure 4B). Comparatively, the  
346 corrected c-index for HPV status-based models alone was 0.666 for PFS and 0.631 for DSS. For

347 immunoscore<sup>PFS</sup> and immunoscore<sup>DSS</sup> based models the corrected c-index were 0.667 and 0.715  
348 for PFS and DSS respectively. To further assess the efficacy of the nomograms an IS-HPV index  
349 score was computed for all the patients in the cohort based on coefficients derived from logistic  
350 regression models used to construct the nomograms: IS-HPV index<sup>PFS</sup> score = (1.558 x  
351 immunoscore) + (-1.931 x HPV status) and IS-HPV index<sup>DSS</sup> score = (2.152 x immunoscore) + (-  
352 2.066 x HPV status). The IS-HPV index scores were then dichotomized based on the maximally  
353 selected rank statistics method to select a cutoff (-0.430 for IS-HPV index<sup>PFS</sup> and -0.028 for IS-  
354 HPV index<sup>DSS</sup>) for Kaplan-Meier analysis. High IS-HPV index<sup>PFS</sup> and IS-HPV index<sup>DSS</sup> scores  
355 were associated with poor PFS (log rank test: p < 0.001) and DSS (log rank test: p < 0.001)  
356 respectively (Figure 4C) and an improved discriminatory ability was observed for DSS when  
357 comparing the IS-HPV index<sup>DSS</sup> to HPV status alone (Supplementary Figure 6). Furthermore,  
358 decision curve analysis demonstrated a clear net benefit from using the IS-HPV index<sup>PFS</sup>  
359 nomogram when the threshold probability exceeded 0.15 PFS, and consistently across all threshold  
360 probabilities for DSS. At clinically relevant threshold probabilities for DSS, the integrated IS-HPV  
361 index<sup>DSS</sup> model surpassed the performance of the immunoscore and HPV status models  
362 individually (Figure 4D).

363

364

365

366

367

368

369

370



## 371 Discussion

372 It is becoming increasingly evident that the efficacy of immunotherapeutic modalities in cancer is  
373 affected by the ability to establish an enduring immune response. Indeed, the local immune  
374 infiltrate undergoes dynamic changes following treatment and may be indicative of prognosis in  
375 cancer (12). The association between *in-situ* infiltration of immune cell subsets and survival in  
376 VSCC remains unclear and the search for novel biomarkers continues. Here, we developed the  
377 first immunoscore model for VSCC by interrogating PD-L1 expression and immune cell  
378 infiltration patterns in the epithelium and stroma of tumors. Our analysis revealed that  
379 immunoscores independently predict survival in VSCC providing superior prognostication  
380 compared to immunological features assessed alone. Furthermore, integrating immunoscores with  
381 HPV status and establishing an IS-HPV index improved the prognostic impact of the models.

382  
383 VSCC manifests through two distinct molecular pathways: HPV-independent and HPV-associated  
384 disease (25). Studies have shown that HPV-independent tumors are associated with poorer survival  
385 (10, 11, 26) and novel biomarkers are needed to categorize these cases. Immunoscores are  
386 prognostic tools focused on tumor immune interactions, that may contribute additional clinical  
387 value to traditional staging systems (27). Even though combined risk factor models have been  
388 presented for VSCC (28, 29), immunoscores have yet to be explored. In this study low  
389 immunoscores corresponded with improved PFS and DSS respectively in HPV-independent  
390 tumors suggesting that clinical use of immunoscores could improve risk stratification in VSCC.  
391 Moreover, immunoscores were independent predictors of survival in the entire VSCC cohort,  
392 corroborating findings from other cancer types (30, 31), although the immunological features used  
393 to determine the models differed. Previously, immunoscores were established based on infiltration

394 of T cells (19, 27, 32) however in this study myeloid subsets were also included to more accurately  
395 reflect the immune landscape. Besides the number of infiltrating immune cells, studies have also  
396 shown that the spatiotemporal dynamics influence disease progression (33). We therefore spatially  
397 resolved immunological features and investigated the epithelial or stromal specific contribution  
398 instead of only focusing on the density of cells (34). To accomplish this, IHC and digital  
399 quantification were used to determine immunoscores. The immunoscores were then integrated  
400 with HPV status to form easy-to-use nomograms. At clinically relevant threshold probabilities for  
401 DSS, our data indicates that using the nomogram may offer additional clinical benefit to VSCC  
402 patients compared to HPV status or immunoscore based models alone. Similarly, He et al  
403 demonstrated that combining immunoscores with clinicopathological features improved the  
404 impact of the models in non-small cell lung carcinoma (NSCLC) (35). Taken together, our findings  
405 suggest that the IS-HPV index model could be a rapid and cost-effective diagnostic test to improve  
406 risk stratification in VSCC and may enable selection of patients who are likely to benefit from less  
407 aggressive treatment regimens. Furthermore, the immunoscores may demonstrate predictive value  
408 for immunotherapy, as recently reported for NSCLC (36), however we were unable to assess this  
409 in our cohort as patients had not received immunotherapy.

410

411 We also assessed the immunological features used to determine immunoscores individually. PD-  
412 L1 is pivotal in cancer immunoediting and the expression level impacts patient survival outcomes  
413 in many cancer types (37). Consistent with Hecking et al, our data indicates that positive PD-L1  
414 status (TPS > 1) is an independent prognostic factor associated with poor survival, HPV-  
415 independent disease (17), and the p53+/p16- subtype. Other studies found no association between  
416 epithelial PD-L1 expression and survival (38, 39). The discrepancies may stem from variations in

417 sample size or methodologies and thresholds used to define PD-L1 status. Considering the rarity  
418 of this disease, a relatively large cohort was recruited in this study and PD-L1 expression was  
419 determined by IHC and digital image analysis instead of manual scoring or genomic profiling. PD-  
420 L1 status was determined by TPS > 1 contrasting other studies where higher thresholds were used  
421 (18, 39, 40). Future work is needed to harmonize scoring and cut-offs to evaluate the prognostic  
422 importance of PD-L1 in VSCC. Notably, PD-L1 status was discordant when comparing primary  
423 tumors to corresponding recurrent or metastatic lesions, aligning with previous reports (38),  
424 indicating it may be important to retest this marker in metastatic or recurrent VSCC.

425  
426 Our data revealed a strong correlation between the number of PD-L1+ cells and infiltration of  
427 CD68+ macrophages in both the epithelium and stroma of VSCC. Studies have suggested that  
428 tumor associated macrophages (TAMs) are the predominant immune cells that express PD-L1  
429 along with cancer cells in NSCLC and breast cancer (41, 42). The strong correlation we observed  
430 may therefore be due to the presence of TAMs expressing CD68+ and PD-L1+ surface markers.  
431 Additionally, high stromal infiltration of CD68+ macrophages was linked to HPV-independent  
432 tumors and poorer survival outcomes. Condic et al. reported that CD163+ TAMs were an  
433 unfavorable prognostic variable in VSCC (43). While CD68+ serves as a universal marker for  
434 macrophages, CD163+ is predominantly expressed by the M2-polarized subtype. Similar to  
435 CD68+ macrophages, high stromal CD14+ monocyte infiltration was linked to poor survival and  
436 HPV-independent pathogenesis. Van Esch et al showed no significant association between stromal  
437 CD14+ infiltration and survival in vulvar epithelial neoplasia lesions, however HPV-independent  
438 VSCC cases which constitute most of our cohort, were not assessed in their study (44). In contrast,  
439 Abdulrahman et al reported that a strong epithelial CD14+ infiltration was associated with

440 improved survival (45). Importantly, these cells were negative for other myeloid markers while  
441 our study consisted of a mixed population of CD14+ positive cells. Future work should aim to  
442 decipher the macrophage and monocyte subtypes in our cohort.

443

444 Lymphocytes, particularly CD8+ T cells, are essential effectors in the adaptive immune response  
445 against tumors (46). In accordance with other studies, we found no correlation between epithelial  
446 CD8+ T cell infiltration and survival in VSCC (47). Conversely, Kortekaas, et al. reported that  
447 CD3+CD8+Foxp3- T cell infiltration in the epithelial compartments was correlated with favorable  
448 survival (15). An earlier study reported no association between this T cell subset and survival,  
449 irrespective of dichotomization using median values or ROC analysis (16) highlighting the need  
450 for further research. Inconsistent with our results, the number of CD3+CD8+FoxP3- and  
451 CD3+CD8-FoxP3+ T cells were significantly different when comparing HPV-independent and  
452 HPV-associated disease in the abovementioned study. The discrepancies may be due to differences  
453 in the investigated immune cell subtypes. Although epithelial infiltration of FoxP3+ T cells was  
454 associated with improved DSS, independent prognostic value was not observed in this study  
455 conflicting with another report (48). Here, the prognostic impact of FoxP3+ was adjusted for HPV  
456 mRNA ISH instead of p16 IHC as a surrogate marker for HPV. Our group recently demonstrated  
457 differences concerning HPV mRNA ISH and p16 IHC for prediction of survival in VSCC (10).

458

459 This study has limitations such as the retrospective study design and the recruitment of all  
460 participants from one single center. To mitigate the limitations, thorough internal validation was  
461 conducted. However, multicenter prospective studies are necessary to further confirm the  
462 generalizability of our findings. In this study PD-L1 expression and immune cell infiltration were

463 investigated using IHC and digital image analysis based on established algorithms. A key  
464 advantage of this approach is the acquisition of data through unbiased measurements. However,  
465 the method faces challenges, including difficulties applying automated workflows to produce  
466 accurate results due to biomarker heterogeneity and divergences in tissue samples. Routine  
467 calibration with a pathologist was performed to ensure analysis validity. Furthermore, data  
468 acquired from TMA cores may not be biologically representative due to intra- tumor heterogeneity.  
469 We attempted to mitigate the impact of this by averaging two or three cores per case for  
470 downstream analysis. Additionally, our data demonstrated that the method of dichotomization may  
471 influence analysis outcomes. Future studies are therefore required to determine the optimal  
472 approach for dichotomizing biomarkers to binary variables (49).

473

474 In summary, this study provides a comprehensive analysis of PD-L1 expression and immune cell  
475 infiltration in epithelial and stromal compartments of VSCC. For the first time, we introduce a  
476 VSCC immunoscore designed to enhance disease risk stratification. By integrating this  
477 immunoscore with HPV status, determined via HPV mRNA ISH, we established an immunoscore-  
478 HPV index for prediction of PFS and DSS in VSCC. Additional research is necessary to confirm  
479 the accuracy and clinical utility of the immunoscore-HPV index models.

480

481

482

483

484

485

486 **Abbreviations:**

487 C-INDEX: concordance-index

488 DSS: disease specific survival

489 FFPE: formalin-fixed paraffin embedded

490 FIGO: the International Federation of Gynecology and Obstetrics

491 HPV: human papilloma virus

492 HUS: Haukeland University Hospital

493 IHC: immunohistochemistry

494 ISH: in situ hybridization

495 IS-HPV: immunoscore-human papilloma virus index

496 LASSO: least absolute shrinkage and selection operator

497 PCR: polymerase chain reaction

498 PD-1: programmed cell death protein-1

499 PD-L1: programmed death ligand protein-1

500 PFS: progression free survival

501 REK: Regional Committee for Medical and Health Research Ethics

502 TIME: tumor immune microenvironment

503 TMA: tissue microarray

504 VSCC: vulva squamous cell carcinoma

505

506

507

508 **Declarations**

509 **Ethics approval and consent to participate**

510 This study was approved by the Regional Committee for Medical and Health Research Ethics  
511 Norway (REK Nos: 2017/279 and 2014/1907). Written consent was obtained from all participants  
512 included in this study.

513

514 **Consent for publication**

515 Not applicable

516

517 **Availability of data and materials**

518 Data associated with the findings of this study are included in the article or in the uploaded  
519 supplementary files and are available from the corresponding author upon reasonable request.

520

521 **Competing interests**

522 None

523

524 **Funding**

525 This study was supported by The Research Council of Norway through its Centers of Excellence  
526 funding scheme (DEC, Grant No. 22325 to Center of Excellency for Cancer Biomarkers CCBIO),  
527 The Western Norway Regional Health Authority (DEC, Helse Vest Grant Nos 912260/2019 and  
528 F-13105/2024), and the Norwegian Women's Public Health Association (Grant no. 40021).

529

530 **Authors' contributions**

531 Conceptualization, RE, DEC, LB and HND; data curation, RE, LB and HND; formal analysis,  
532 RE and HND; funding acquisition, HND, LB and DEC; investigation, RE, IHH, MF, IBMK,  
533 LCVT and HND; methodology, RE, IHH, MF and HND; project administration, DEC, LB and  
534 HND; supervision, DEC, LB and HND; validation, RE and HND; visualization, RE, IBMK,  
535 LVCT; writing—original draft, RE and HND; writing—review & editing, RE, HND, DEC and  
536 LB. All authors have read and agreed to the published version of the manuscript.

537

### 538 **Acknowledgements**

539 We would like to thank all the patients who participated in this study.

540

541

542

543

544

545

546

547

548

549

550



## 551 References

- 552 1. Bray F, Laversanne M, Sung H, Ferlay J, Siegel RL, Soerjomataram I, et al. Global  
553 cancer statistics 2022: GLOBOCAN estimates of incidence and mortality worldwide for 36  
554 cancers in 185 countries. *CA Cancer J Clin.* 2024;74(3):229-63.
- 555 2. Siegel RL, Giaquinto AN, Jemal A. Cancer statistics, 2024. *CA Cancer J Clin.*  
556 2024;74(1):12-49.
- 557 3. Meltzer-Gunnes CJ, Lie AK, Jonassen CGM, Rangberg A, Nystrand CF, Smastuen MC,  
558 et al. Time trends in human papillomavirus prevalence and genotype distribution in vulvar  
559 carcinoma in Norway. *Acta Obstet Gynecol Scand.* 2024;103(1):153-64.
- 560 4. Zach D, Avall-Lundqvist E, Falconer H, Hellman K, Johansson H, Floter Radestad A.  
561 Patterns of recurrence and survival in vulvar cancer: A nationwide population-based study.  
562 *Gynecol Oncol.* 2021;161(3):748-54.
- 563 5. Nooij LS, Brand FA, Gaarenstroom KN, Creutzberg CL, de Hullu JA, van Poelgeest MI.  
564 Risk factors and treatment for recurrent vulvar squamous cell carcinoma. *Crit Rev Oncol*  
565 *Hematol.* 2016;106:1-13.
- 566 6. Schnack TH, Froeding LP, Kristensen E, Niemann I, Ortoft G, Hogdall E, et al.  
567 Preoperative predictors of inguinal lymph node metastases in vulvar cancer - A nationwide  
568 study. *Gynecol Oncol.* 2022;165(3):420-7.
- 569 7. Soderini A, Aragona A, Reed N. Advanced Vulvar Cancers: What are the Best Options  
570 for Treatment? *Curr Oncol Rep.* 2016;18(10):64.
- 571 8. Weberpals JI, Lo B, Duciaume MM, Spaans JN, Clancy AA, Dimitroulakos J, et al.  
572 Vulvar Squamous Cell Carcinoma (VSCC) as Two Diseases: HPV Status Identifies Distinct

- 573 Mutational Profiles Including Oncogenic Fibroblast Growth Factor Receptor 3. *Clin Cancer Res.*  
574 2017;23(15):4501-10.
- 575 9. Hinten F, Molijn A, Eckhardt L, Massuger L, Quint W, Bult P, et al. Vulvar cancer: Two  
576 pathways with different localization and prognosis. *Gynecol Oncol.* 2018;149(2):310-7.
- 577 10. Dongre HN, Elnour R, Tornaas S, Fromreide S, Thomsen LCV, Kolseth IBM, et al. TP53  
578 mutation and human papilloma virus status as independent prognostic factors in a Norwegian  
579 cohort of vulva squamous cell carcinoma. *Acta Obstet Gynecol Scand.* 2024;103(1):165-75.
- 580 11. Kortekaas KE, Bastiaannet E, van Doorn HC, de Vos van Steenwijk PJ, Ewing-Graham  
581 PC, Creutzberg CL, et al. Vulvar cancer subclassification by HPV and p53 status results in three  
582 clinically distinct subtypes. *Gynecol Oncol.* 2020;159(3):649-56.
- 583 12. Bruni D, Angell HK, Galon J. The immune contexture and Immunoscore in cancer  
584 prognosis and therapeutic efficacy. *Nat Rev Cancer.* 2020;20(11):662-80.
- 585 13. Santoro A, Angelico G, Inzani F, Arciuolo D, d'Amati A, Addante F, et al. The emerging  
586 and challenging role of PD-L1 in patients with gynecological cancers: An updating review with  
587 clinico-pathological considerations. *Gynecol Oncol.* 2024;184:57-66.
- 588 14. Schwab R, Schiestl LJ, Cascant Ortolano L, Klecker PH, Schmidt MW, Almstedt K, et  
589 al. Efficacy of pembrolizumab in advanced cancer of the vulva: a systematic review and single-  
590 arm meta-analysis. *Front Oncol.* 2024;14:1352975.
- 591 15. Kortekaas KE, Santegoets SJ, Tas L, Ehsan I, Charoentong P, van Doorn HC, et al.  
592 Primary vulvar squamous cell carcinomas with high T cell infiltration and active immune  
593 signaling are potential candidates for neoadjuvant PD-1/PD-L1 immunotherapy. *J Immunother*  
594 *Cancer.* 2021;9(10).

- 595 16. Kortekaas KE, Santegoets SJ, Abdulrahman Z, van Ham VJ, van der Tol M, Ehsan I, et  
596 al. High numbers of activated helper T cells are associated with better clinical outcome in early  
597 stage vulvar cancer, irrespective of HPV or p53 status. *J Immunother Cancer*. 2019;7(1):236.
- 598 17. Hecking T, Thiesler T, Schiller C, Lunkenheimer JM, Ayub TH, Rohr A, et al. Tumoral  
599 PD-L1 expression defines a subgroup of poor-prognosis vulvar carcinomas with non-viral  
600 etiology. *Oncotarget*. 2017;8(54):92890-903.
- 601 18. Sznurkowski JJ, Zawrocki A, Sznurkowska K, Peksa R, Biernat W. PD-L1 expression on  
602 immune cells is a favorable prognostic factor for vulvar squamous cell carcinoma patients.  
603 *Oncotarget*. 2017;8(52):89903-12.
- 604 19. Pages F, Mlecnik B, Marliot F, Bindea G, Ou FS, Bifulco C, et al. International  
605 validation of the consensus Immunoscore for the classification of colon cancer: a prognostic and  
606 accuracy study. *Lancet*. 2018;391(10135):2128-39.
- 607 20. Pages F, Andre T, Taieb J, Vernerey D, Henriques J, Borg C, et al. Prognostic and  
608 predictive value of the Immunoscore in stage III colon cancer patients treated with oxaliplatin in  
609 the prospective IDEA France PRODIGE-GERCOR cohort study. *Ann Oncol*. 2020;31(7):921-9.
- 610 21. Argiles G, Tabernero J, Labianca R, Hochhauser D, Salazar R, Iveson T, et al. Localised  
611 colon cancer: ESMO Clinical Practice Guidelines for diagnosis, treatment and follow-up. *Ann*  
612 *Oncol*. 2020;31(10):1291-305.
- 613 22. Haave H, Gulati S, Brekke J, Lybak S, Vintermyr OK, Aarstad HJ. Tumor stromal  
614 desmoplasia and inflammatory response uniquely predict survival with and without stratification  
615 for HPV tumor infection in OPSCC patients. *Acta Otolaryngol*. 2018;138(11):1035-42.
- 616 23. Bankhead P, Loughrey MB, Fernandez JA, Dombrowski Y, McArt DG, Dunne PD, et al.  
617 QuPath: Open source software for digital pathology image analysis. *Sci Rep*. 2017;7(1):16878.

- 618 24. Davis AA, Patel VG. The role of PD-L1 expression as a predictive biomarker: an analysis  
619 of all US Food and Drug Administration (FDA) approvals of immune checkpoint inhibitors. *J*  
620 *Immunother Cancer*. 2019;7(1):278.
- 621 25. Clancy AA, Spaans JN, Weberpals JI. The forgotten woman's cancer: vulvar squamous  
622 cell carcinoma (VSCC) and a targeted approach to therapy. *Ann Oncol*. 2016;27(9):1696-705.
- 623 26. Allo G, Yap ML, Cuartero J, Milosevic M, Ferguson S, Mackay H, et al. HPV-  
624 independent Vulvar Squamous Cell Carcinoma is Associated With Significantly Worse  
625 Prognosis Compared With HPV-associated Tumors. *Int J Gynecol Pathol*. 2020;39(4):391-9.
- 626 27. Angell HK, Bruni D, Barrett JC, Herbst R, Galon J. The Immunoscore: Colon Cancer and  
627 Beyond. *Clin Cancer Res*. 2020;26(2):332-9.
- 628 28. Zhang T, Zhu Y, Luo J, Li J, Niu S, Chen H, et al. An integrated model for prognosis in  
629 vulvar squamous cell carcinoma. *BMC Cancer*. 2023;23(1):534.
- 630 29. Zhao Z, Zhen S, Liu N, Ding D, Zhang D, Kong J. Survival nomograms for vulvar  
631 squamous cell carcinoma based on the SEER database and a Chinese external validation cohort.  
632 *Int J Gynaecol Obstet*. 2024;165(3):1130-43.
- 633 30. Ghiringhelli F, Bibeau F, Greillier L, Fumet JD, Ilie A, Monville F, et al. Immunoscore  
634 immune checkpoint using spatial quantitative analysis of CD8 and PD-L1 markers is predictive  
635 of the efficacy of anti- PD1/PD-L1 immunotherapy in non-small cell lung cancer. *EBioMedicine*.  
636 2023;92:104633.
- 637 31. Mezheyski A, Backman M, Mattsson J, Martin-Bernabe A, Larsson C, Hrynchyk I, et  
638 al. An immune score reflecting pro- and anti-tumoural balance of tumour microenvironment has  
639 major prognostic impact and predicts immunotherapy response in solid cancers. *EBioMedicine*.  
640 2023;88:104452.

- 641 32. Han B, Yim J, Lim S, Na S, Lee C, Kim TM, et al. Prognostic Impact of the  
642 Immunoscore Based on Whole-Slide Image Analysis of CD3+ Tumor-Infiltrating Lymphocytes  
643 in Diffuse Large B-Cell Lymphoma. *Mod Pathol.* 2023;36(9):100224.
- 644 33. Mezheyeuski A, Bergsland CH, Backman M, Djureinovic D, Sjoblom T, Bruun J, et al.  
645 Multispectral imaging for quantitative and compartment-specific immune infiltrates reveals  
646 distinct immune profiles that classify lung cancer patients. *J Pathol.* 2018;244(4):421-31.
- 647 34. Nie RC, Yuan SQ, Wang Y, Chen YB, Cai YY, Chen S, et al. Robust immunoscore  
648 model to predict the response to anti-PD1 therapy in melanoma. *Aging (Albany NY).*  
649 2019;11(23):11576-90.
- 650 35. He L, Huang Y, Chen X, Huang X, Wang H, Zhang Y, et al. Development and  
651 Validation of an Immune-Based Prognostic Risk Score for Patients With Resected Non-Small  
652 Cell Lung Cancer. *Front Immunol.* 2022;13:835630.
- 653 36. Hijazi A, Antoniotti C, Cremolini C, Galon J. Light on life: immunoscore immune-  
654 checkpoint, a predictor of immunotherapy response. *Oncoimmunology.* 2023;12(1):2243169.
- 655 37. Schreiber RD, Old LJ, Smyth MJ. Cancer immunoediting: integrating immunity's roles in  
656 cancer suppression and promotion. *Science.* 2011;331(6024):1565-70.
- 657 38. Lerias S, Esteves S, Silva F, Cunha M, Cochicho D, Martins L, et al. CD274 (PD-L1),  
658 CDKN2A (p16), TP53, and EGFR immunohistochemical profile in primary, recurrent and  
659 metastatic vulvar cancer. *Mod Pathol.* 2020;33(5):893-904.
- 660 39. Thangarajah F, Morgenstern B, Pahmeyer C, Schiffmann LM, Puppe J, Mallmann P, et  
661 al. Clinical impact of PD-L1 and PD-1 expression in squamous cell cancer of the vulva. *J Cancer*  
662 *Res Clin Oncol.* 2019;145(6):1651-60.

- 663 40. Czogalla B, Pham D, Trillsch F, Rottmann M, Gallwas J, Burges A, et al. PD-L1  
664 expression and survival in p16-negative and -positive squamous cell carcinomas of the vulva. *J*  
665 *Cancer Res Clin Oncol*. 2020;146(3):569-77.
- 666 41. Liu Y, Zugazagoitia J, Ahmed FS, Henick BS, Gettinger SN, Herbst RS, et al. Immune  
667 Cell PD-L1 Colocalizes with Macrophages and Is Associated with Outcome in PD-1 Pathway  
668 Blockade Therapy. *Clin Cancer Res*. 2020;26(4):970-7.
- 669 42. Wang L, Guo W, Guo Z, Yu J, Tan J, Simons DL, et al. PD-L1-expressing tumor-  
670 associated macrophages are immunostimulatory and associate with good clinical outcome in  
671 human breast cancer. *Cell Rep Med*. 2024;5(2):101420.
- 672 43. Condic M, Rohr A, Riemann S, Staerk C, Ayub TH, Doeser A, et al. Immune Profiling of  
673 Vulvar Squamous Cell Cancer Discovers a Macrophage-rich Subtype Associated with Poor  
674 Prognosis. *Cancer Res Commun*. 2024;4(3):861-75.
- 675 44. van Esch EM, van Poelgeest MI, Trimbos JB, Fleuren GJ, Jordanova ES, van der Burg  
676 SH. Intraepithelial macrophage infiltration is related to a high number of regulatory T cells and  
677 promotes a progressive course of HPV-induced vulvar neoplasia. *Int J Cancer*. 2015;136(4):E85-  
678 94.
- 679 45. Abdulrahman Z, Kortekaas KE, Welters MJP, van Poelgeest MIE, van der Burg SH.  
680 Monocyte infiltration is an independent positive prognostic biomarker in vulvar squamous cell  
681 carcinoma. *Cancer Immunol Immunother*. 2024;73(9):166.
- 682 46. Raskov H, Orhan A, Christensen JP, Gogenur I. Cytotoxic CD8(+) T cells in cancer and  
683 cancer immunotherapy. *Br J Cancer*. 2021;124(2):359-67.

- 684 47. Burandt E, Blessin NC, Rolschewski AC, Lutz F, Mandelkow T, Yang C, et al. T-Cell  
685 Density at the Invasive Margin and Immune Phenotypes Predict Outcome in Vulvar Squamous  
686 Cell Cancer. *Cancers (Basel)*. 2022;14(17).
- 687 48. Arik D, Benli T, Telli E. Number of FoxP3+ regulatory T-cells are associated with  
688 recurrence in vulvar squamous cell carcinoma. *J Gynecol Oncol*. 2023;34(2):e16.
- 689 49. Prince Nelson SL, Ramakrishnan V, Nietert PJ, Kamen DL, Ramos PS, Wolf BJ. An  
690 evaluation of common methods for dichotomization of continuous variables to discriminate  
691 disease status. *Commun Stat Theory Methods*. 2017;46(21):10823-34.
- 692

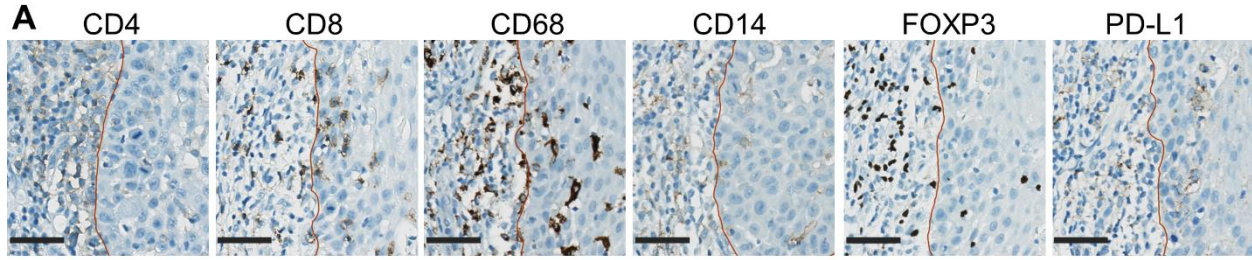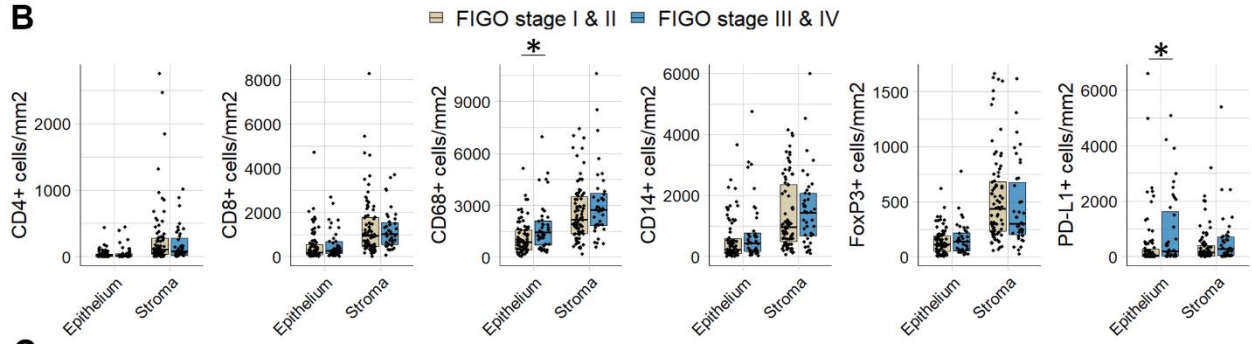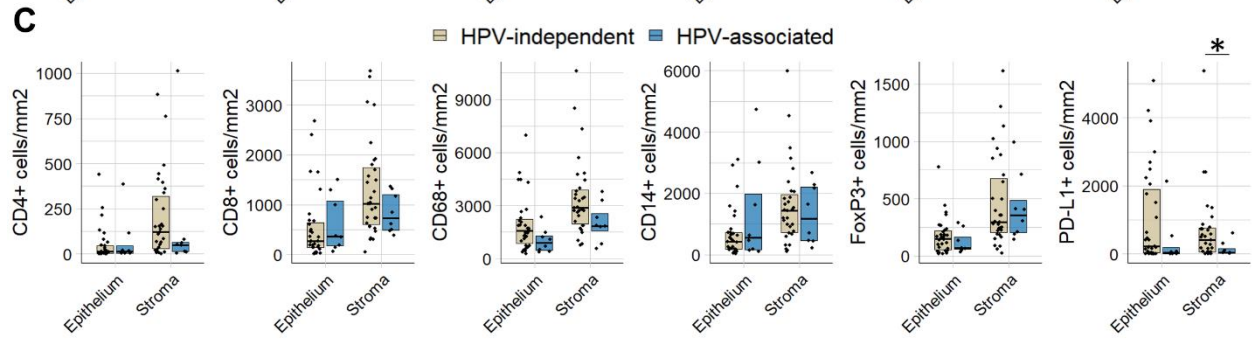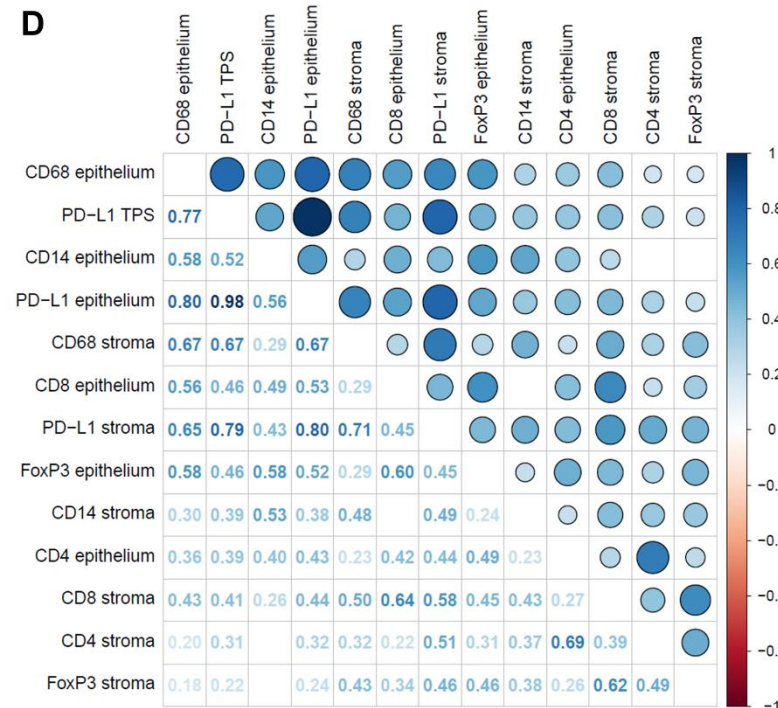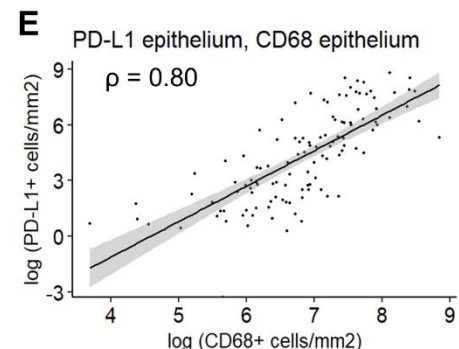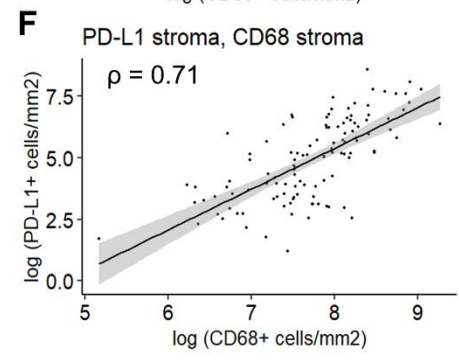



694 **Figure 1: PD-L1 expression and immune cell infiltration in VSCC.** (A) Representative  
695 immunohistochemical staining of CD4+, CD8+, CD68+, CD14+, FoxP3+, and PD-L1+ cells.  
696 Scale bar = 50  $\mu\text{m}$ . (B) Box plots depicting differences in the number of cells per  $\text{mm}^2$  based on  
697 FIGO stage. (C) Box plots depicting differences in the number of cells per  $\text{mm}^2$  based on HPV  
698 status, as determined by HPV mRNA ISH, within the advanced VSCC subgroup (FIGO stage  
699 III/IV). p-values  $\leq 0.05$  were considered statistically significant. The box shows the interquartile  
700 range, and medians are highlighted with a black line. Individual cases are represented by black  
701 dots. (D) Matrix showing correlations between immune subsets. Spearman's rank correlation  
702 coefficients ( $\rho$ ) are provided in each box of the matrix. Larger circles with darker shades of blue  
703 demonstrate stronger positive correlations. Correlations that were not statistically significant ( $p >$   
704  $0.05$ ) are shown as blank. Scatterplots with fitted regression lines and 95% confidence interval  
705 showing correlations between PD-L1+ and CD68+ cells in (E) epithelial and (F) stromal  
706 compartments.

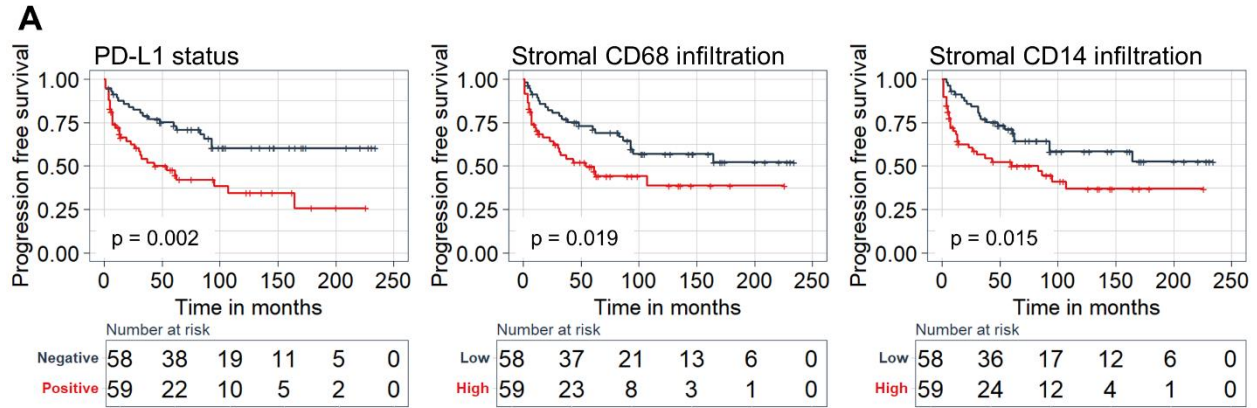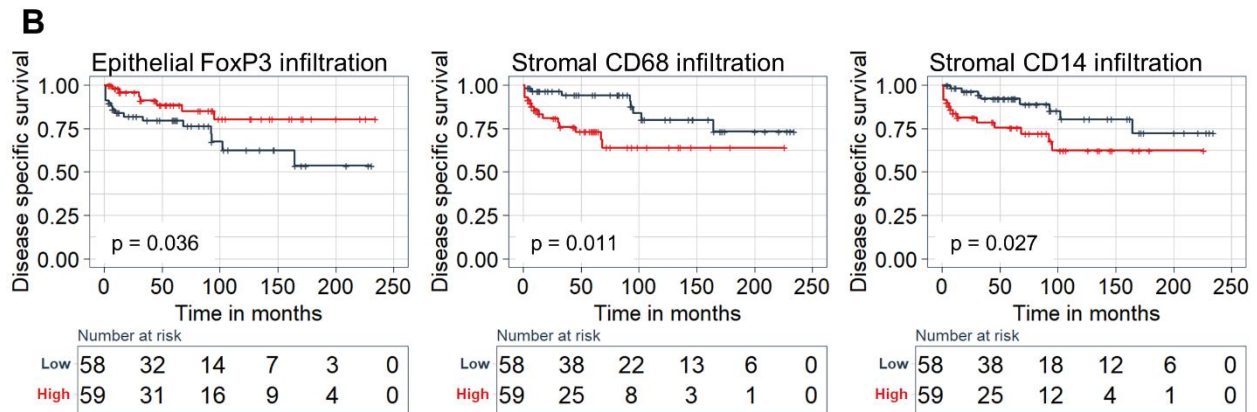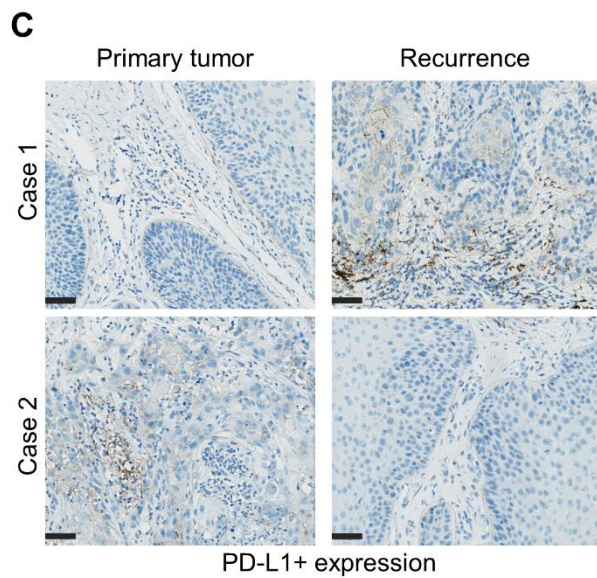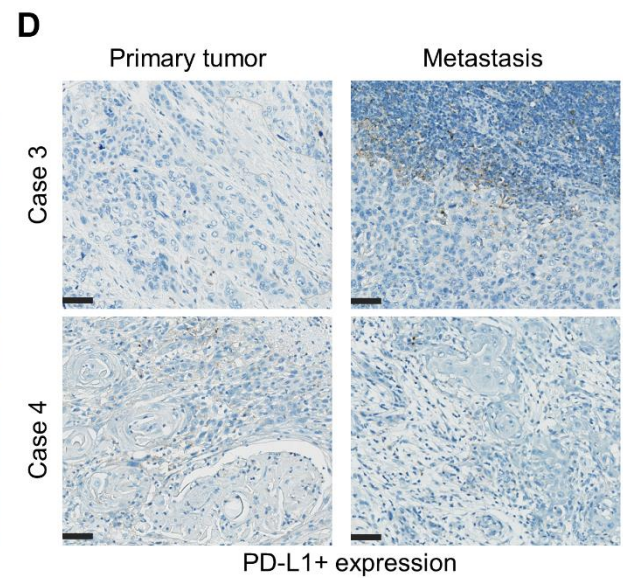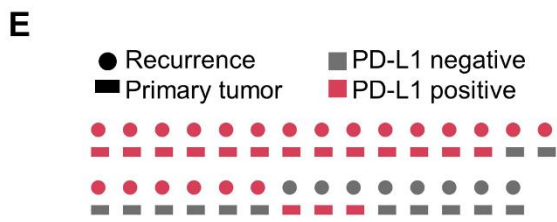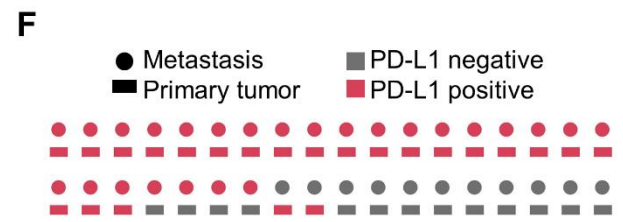

708 **Figure 2: Prognostic value of PD-L1 status and immune cell infiltration.** Kaplan-Meier curves  
709 demonstrating influence of PD-L1 status and stromal CD68+ or CD14+ infiltration on (A)  
710 progression free- and (B) disease specific survival. p-values < 0.05 were considered statistically  
711 significant based on the log rank test. Representative immunohistochemical staining of cases with  
712 discordant PD-L1 expression in primary tumors and corresponding (C) recurrences or (D)  
713 metastatic lesions. Scale bar = 50  $\mu$ m. PD-L1 status patterns in primary tumors and matched (E)  
714 recurrences or (F) metastatic lesions.

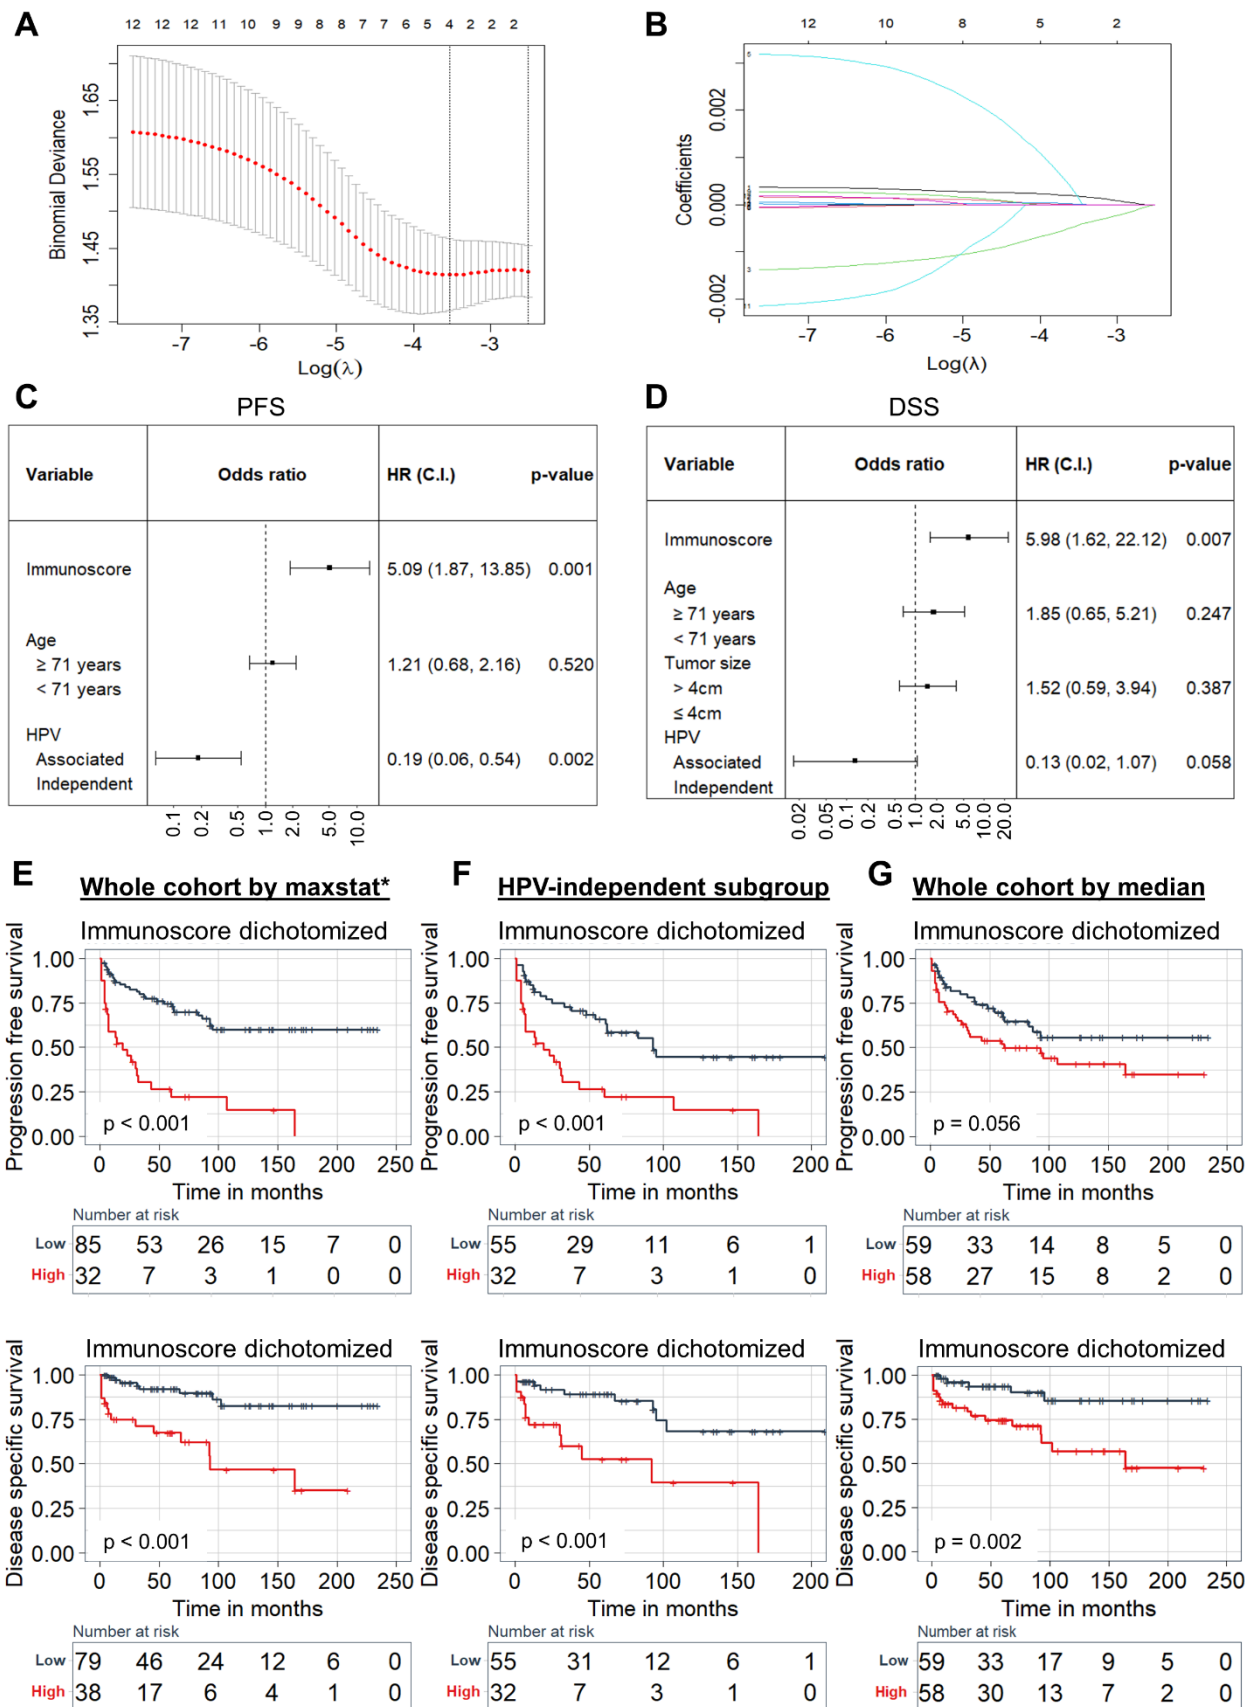

716 **Figure 3: Determining immunoscores based on the LASSO cox regression model.** (A) Immune  
717 feature selection for prediction of PFS by applying 10-fold cross-validation and training a LASSO  
718 regression model. The dotted vertical lines indicate selected  $\lambda$  values using minimum criteria. (B)  
719 Regression coefficient profiles of epithelial and stromal CD4+, CD8+, CD68+, CD14+, FoxP3+,  
720 and PD-L1+ subsets in the LASSO regression model. Forest plots demonstrating the association  
721 of immunoscores and clinicopathological features on (D) PFS and (E) DSS. Hazard ratios (HR)  
722 with 95% confidence interval (C.I.) and p-values are shown. Kaplan-Meier curves showing the  
723 influence of immunoscores, dichotomized by the maximally selected rank statistics (maxstat\*)  
724 method, on PFS and DSS for the (E) entire cohort and (F) HPV-independent subgroup. (G) Kaplan-  
725 Meier curves showing the influence of immunoscores, dichotomized by median values, on PFS  
726 and DSS for the entire cohort

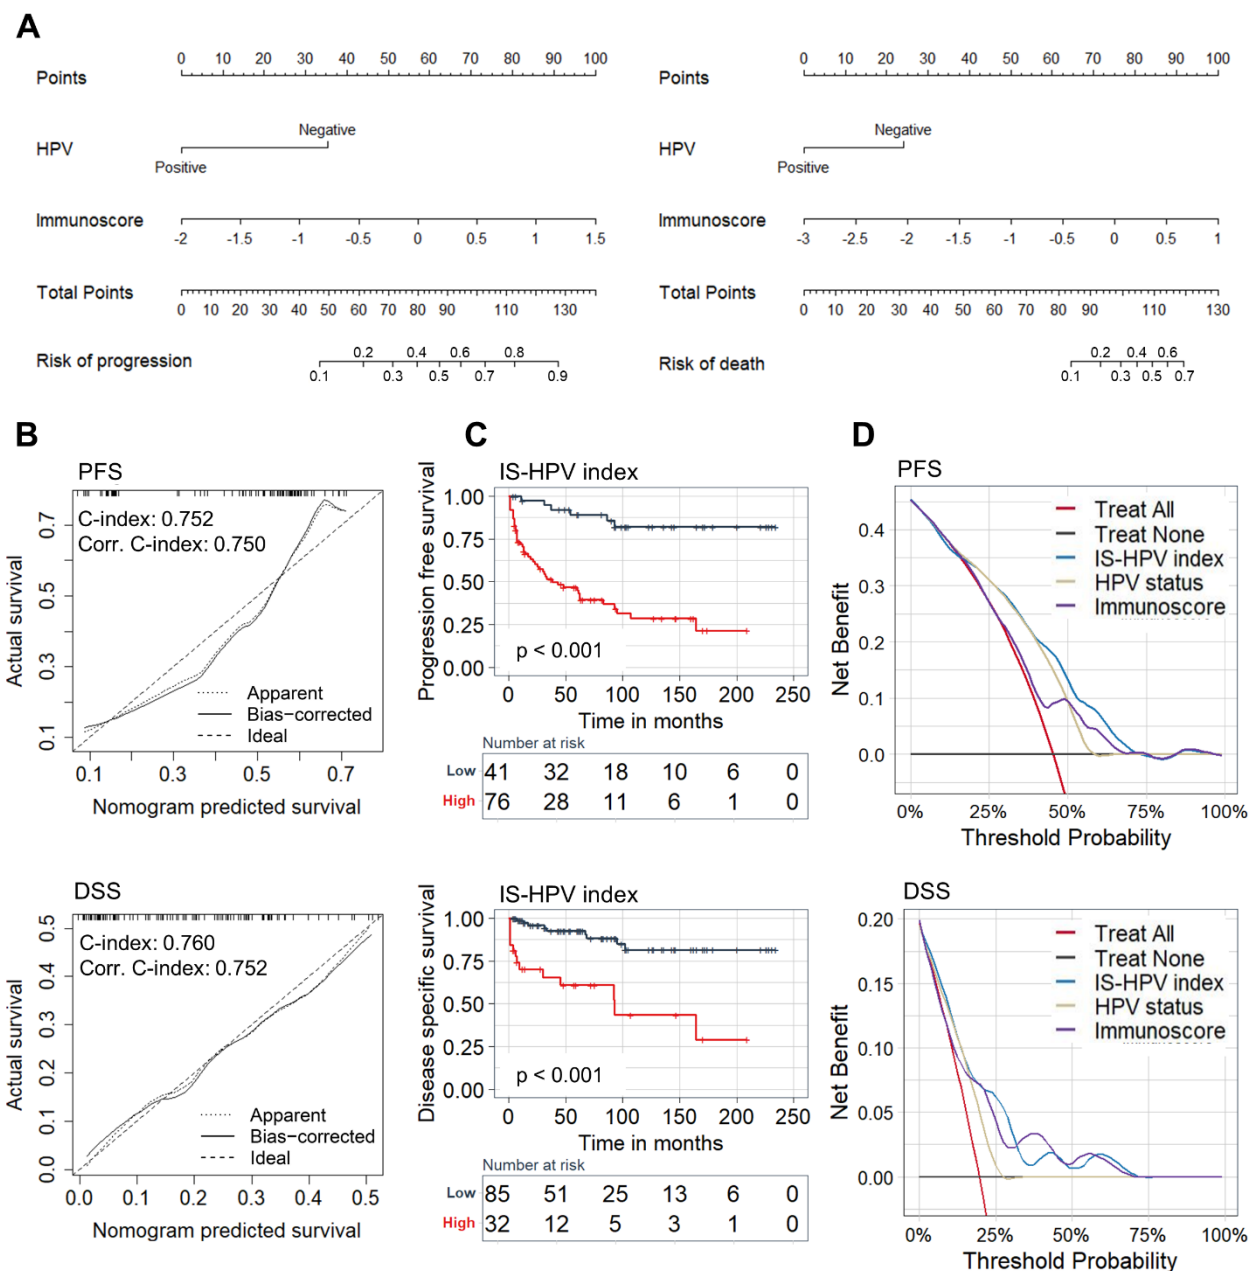

727

728 **Figure 4: Construction of immunoscore-HPV index nomograms.** (A) Immunoscore-HPV (IS-

729 HPV) index nomograms for PFS and DSS. (B) Calibration plots demonstrating the agreement

730 between nomogram predicted outcomes and actual survival outcomes. Concordance index (c-

731 index) and corrected (corr) c-index values are provided. IS-HPV index scores were calculated for

732 the entire VSCC cohort using coefficients from the logistic regression model and dichotomized

733 based on the maximally selected rank statistics method. (C) Kaplan-Meier curves showing the

734 influence of IS-HPV index on PFS and DSS. (D) Decision curve analysis for the nomograms for  
735 PFS and DSS.

736

737

738

739

740

741

742

743

744

745

746

747

748

749

750

751

752

753

754

755

756

757 **Table 1:** Influence of PD-L1 status and immune cell infiltration on progression free- and disease  
 758 specific survival. In the multivariate analysis PFS was adjusted for age and HPV mRNA ISH. DSS  
 759 was adjusted for age, tumor size, and HPV mRNA ISH.

| Progression free survival |                              | Univariate analysis |                    |              | Multivariate analysis |                    |              |
|---------------------------|------------------------------|---------------------|--------------------|--------------|-----------------------|--------------------|--------------|
|                           |                              | HR                  | (95% CI)           | p-value      | HR                    | (95% CI)           | p-value      |
| PD-L1                     | TPS $\geq 1$                 | <b>2.349</b>        | <b>1.342-4.112</b> | <b>0.003</b> | <b>1.802</b>          | <b>1.024-3.170</b> | <b>0.041</b> |
| PD-L1                     | CPS $\geq 1$                 | 2.000               | 0.975-4.106        | 0.059        | -                     | -                  | -            |
| CD4                       | High epithelial Infiltration | 0.969               | 0.565-1.662        | 0.908        | -                     | -                  | -            |
|                           | High stromal Infiltration    | 0.874               | 0.509-1.500        | 0.625        | -                     | -                  | -            |
| CD8                       | High epithelial Infiltration | 0.831               | 0.483-1.429        | 0.503        | -                     | -                  | -            |
|                           | High stromal Infiltration    | 0.994               | 0.580-1.705        | 0.983        | -                     | -                  | -            |
| CD68                      | High epithelial Infiltration | <b>1.754</b>        | <b>1.014-3.031</b> | <b>0.044</b> | 1.532                 | 0.880-2.667        | 0.132        |
|                           | High stromal Infiltration    | <b>1.920</b>        | <b>1.107-3.330</b> | <b>0.020</b> | 1.497                 | 0.861-2.604        | 0.153        |
| CD14                      | High epithelial Infiltration | 1.488               | 0.864-2.561        | 0.151        | -                     | -                  | -            |
|                           | High stromal Infiltration    | <b>1.957</b>        | <b>1.131-3.387</b> | <b>0.016</b> | 1.578                 | 0.893-2.789        | 0.116        |
| FOXP3                     | High epithelial Infiltration | 0.808               | 0.471-1.386        | 0.439        | -                     | -                  | -            |
|                           | High stromal Infiltration    | 0.983               | 0.574-1.685        | 0.951        | -                     | -                  | -            |
| Disease specific survival |                              | Univariate analysis |                    |              | Multivariate analysis |                    |              |
|                           |                              | HR                  | (95% CI)           | p-value      | HR                    | (95% CI)           | p-value      |



|       |                                 |              |                    |              |       |             |       |
|-------|---------------------------------|--------------|--------------------|--------------|-------|-------------|-------|
| PD-L1 | TPS<br>≥ 1                      | 1.878        | 0.816-4.323        | 0.139        | -     | -           | -     |
| PD-L1 | CPS<br>≥ 1                      | 1.479        | 0.546-4.001        | 0.441        | -     | -           | -     |
| CD4   | High epithelial<br>Infiltration | 0.782        | 0.342-1.790        | 0.561        | -     | -           | -     |
| CD4   | High stromal<br>Infiltration    | 0.765        | 0.335-1.745        | 0.524        | -     | -           | -     |
| CD8   | High epithelial<br>Infiltration | 0.651        | 0.281-1.506        | 0.316        | -     | -           | -     |
|       | High stromal<br>Infiltration    | 1.126        | 0.496-2.555        | 0.776        | -     | -           | -     |
| CD68  | High epithelial<br>Infiltration | 1.541        | 0.673-3.529        | 0.307        | -     | -           | -     |
|       | High stromal<br>Infiltration    | <b>2.995</b> | <b>1.241-7.225</b> | <b>0.015</b> | 1.944 | 0.796-4.751 | 0.145 |
| CD14  | High epithelial<br>Infiltration | 1.149        | 0.505-2.615        | 0.741        | -     | -           | -     |
|       | High stromal<br>Infiltration    | <b>2.566</b> | <b>1.083-6.081</b> | <b>0.032</b> | 1.526 | 0.597-3.899 | 0.378 |
| FOXP3 | High epithelial<br>Infiltration | <b>0.397</b> | <b>0.163-0.966</b> | <b>0.042</b> | 0.533 | 0.215-1.317 | 0.173 |
|       | High stromal<br>Infiltration    | 0.868        | 0.383-1.969        | 0.736        | -     | -           | -     |

760

761

762 **Table 2:** Relationship between PD-L1 status, as determined by TPS > 1, and clinicopathological  
763 features.

| Parameters                   | PD-L1 Status |              |              | $\chi^2$<br>(p-value) |
|------------------------------|--------------|--------------|--------------|-----------------------|
|                              | n=117        | Positive (%) | Negative (%) |                       |
| <b>Age</b>                   |              |              |              |                       |
| < 71 years                   | 57 (48.7%)   | 24 (20.5%)   | 33 (28.2%)   | 3.079                 |
| ≥ 71 years                   | 60 (51.3%)   | 35 (29.9%)   | 25 (21.4%)   | (0.079)               |
| <b>BMI</b>                   |              |              |              |                       |
| Normal                       | 31 (26.5%)   | 13 (11.1%)   | 18 (15.4%)   | 1.462                 |
| Overweight/obese             | 54 (46.2%)   | 30 (25.6%)   | 24 (20.5%)   | (0.227)               |
| Unknown                      | 32 (27.3%)   | 15 (12.8%)   | 17 (14.5%)   |                       |
| <b>FIGO stage</b>            |              |              |              |                       |
| Stage I & II                 | 78 (66.7%)   | 35 (29.9%)   | 43 (36.8%)   | 2.889                 |
| Stage III & IV               | 39 (33.3%)   | 24 (20.5%)   | 15 (12.8%)   | (0.089)               |
| <b>Tumor size</b>            |              |              |              |                       |
| ≤ 4cm                        | 81 (69.2%)   | 37 (31.6%)   | 44 (37.6%)   | 2.374                 |
| > 4cm                        | 36 (30.8%)   | 22 (18.8%)   | 14 (12.0%)   | (0.123)               |
| <b>Lymph node metastasis</b> |              |              |              |                       |
| No                           | 79 (67.5%)   | 35 (29.9%)   | 44 (37.6%)   | 3.649                 |
| Yes                          | 38 (32.5%)   | 24 (20.5%)   | 14 (12.0%)   | (0.056)               |
| <b>HPV DNA</b>               |              |              |              |                       |
| Negative                     | 82 (70.1%)   | 49 (41.9%)   | 33 (28.2%)   | <b>9.543</b>          |
| Positive                     | 35 (29.9%)   | 10 (8.5%)    | 25 (21.4%)   | <b>(0.002)</b>        |
| <b>HPV mRNA ISH</b>          |              |              |              |                       |
| Negative                     | 87 (74.4%)   | 51 (43.6%)   | 36 (30.8%)   | <b>9.112</b>          |
| Positive                     | 30 (25.6%)   | 8 (6.8%)     | 22 (18.8%)   | <b>(0.003)</b>        |
| <b>p53/p16</b>               |              |              |              |                       |
| p53+/p16-                    | 54 (46.2%)   | 34 (29.1%)   | 20 (17.1%)   | <b>7.891</b>          |
| p53-/p16+                    | 34 (29.1%)   | 11 (9.4%)    | 23 (19.7%)   | <b>(0.019)</b>        |
| p53-/p16-                    | 29 (24.8%)   | 14 (12.0%)   | 15 (12.8%)   |                       |
| <b>Recurrence of cancer</b>  |              |              |              |                       |
| No                           | 79 (67.5%)   | 35 (29.9%)   | 44 (37.6%)   | 3.649                 |
| Yes                          | 38 (32.5%)   | 24 (20.5%)   | 14 (12.0%)   | (0.056)               |
| <b>Death caused by VSCC</b>  |              |              |              |                       |
| No                           | 94 (80.3%)   | 46 (39.3%)   | 48 (41.0%)   | 0.425                 |
| Yes                          | 23 (19.7%)   | 13 (11.1%)   | 10 (8.5%)    | (0.514)               |

764
